# Supplementary material for: Synthesis, photophysical and electrochemical studies of acridone-amine based donor–acceptors for hole transport materials
Source: Royal Society of Chemistry journal article supplement (doi:10.1039/c5ra25115j), 2016-01-01
Supplement: c5ra25115j1.pdf [file c5ra25115j1.pdf]

**Supporting Information**

**Synthesis, Photophysical and Electrochemical Studies of  
Acridone-Amine based Donor-Acceptors for Hole Transport  
Materials**

|                                                                                                     |       |
|-----------------------------------------------------------------------------------------------------|-------|
| 1) Abbreviations.....                                                                               | 03    |
| 2) <sup>1</sup> H and <sup>13</sup> C NMR spectra.....                                              | 04-09 |
| 3) MALDI-TOF mass Spectra.....                                                                      | 10    |
| 4) FTIR Spectra.....                                                                                | 11-13 |
| 5) Photophysical data <b>table 1</b> of compound <b>1-5</b> in various solvents.....                | 13-14 |
| 6) Absorption and emission spectra of compound <b>1-5</b> in various solvents.....                  | 15-16 |
| 7) Life time measurement <b>table 2</b> of compounds <b>1-5</b> in toluene.....                     | 17    |
| 8) Life time measurement of compounds <b>1-5</b> in toluene.....                                    | 17-18 |
| 9) Cyclic voltammetry and differential pulse voltammetry of compounds <b>1-6</b> .....              | 19-21 |
| 10) Thermo-Gravimetric (TG) and Differential thermal Analysis (DTA) Plots of<br>compounds 1-5 ..... | 22-24 |

**Abbreviations:**

The following abbreviations are used throughout the manuscript and supporting information dipalladium-tris(dibenzylideneacetone),  $\text{Pd}_2(\text{dba})_3$ ; 2-dicyclohexylphosphino-2',6'-dimethylbiphenyl, SPhos; sodium-tert-butoxide, t-BuONa; Calculated, calcd; Nuclear magnetic resonance, NMR; MALDI-TOF; Fourier transform infrared, FT-IR; Cyclic voltammetry, CV; Differential Pulse voltammetry, DPV.

# 1) <sup>1</sup>H and <sup>13</sup>C NMR Spectra of compounds (1-7)

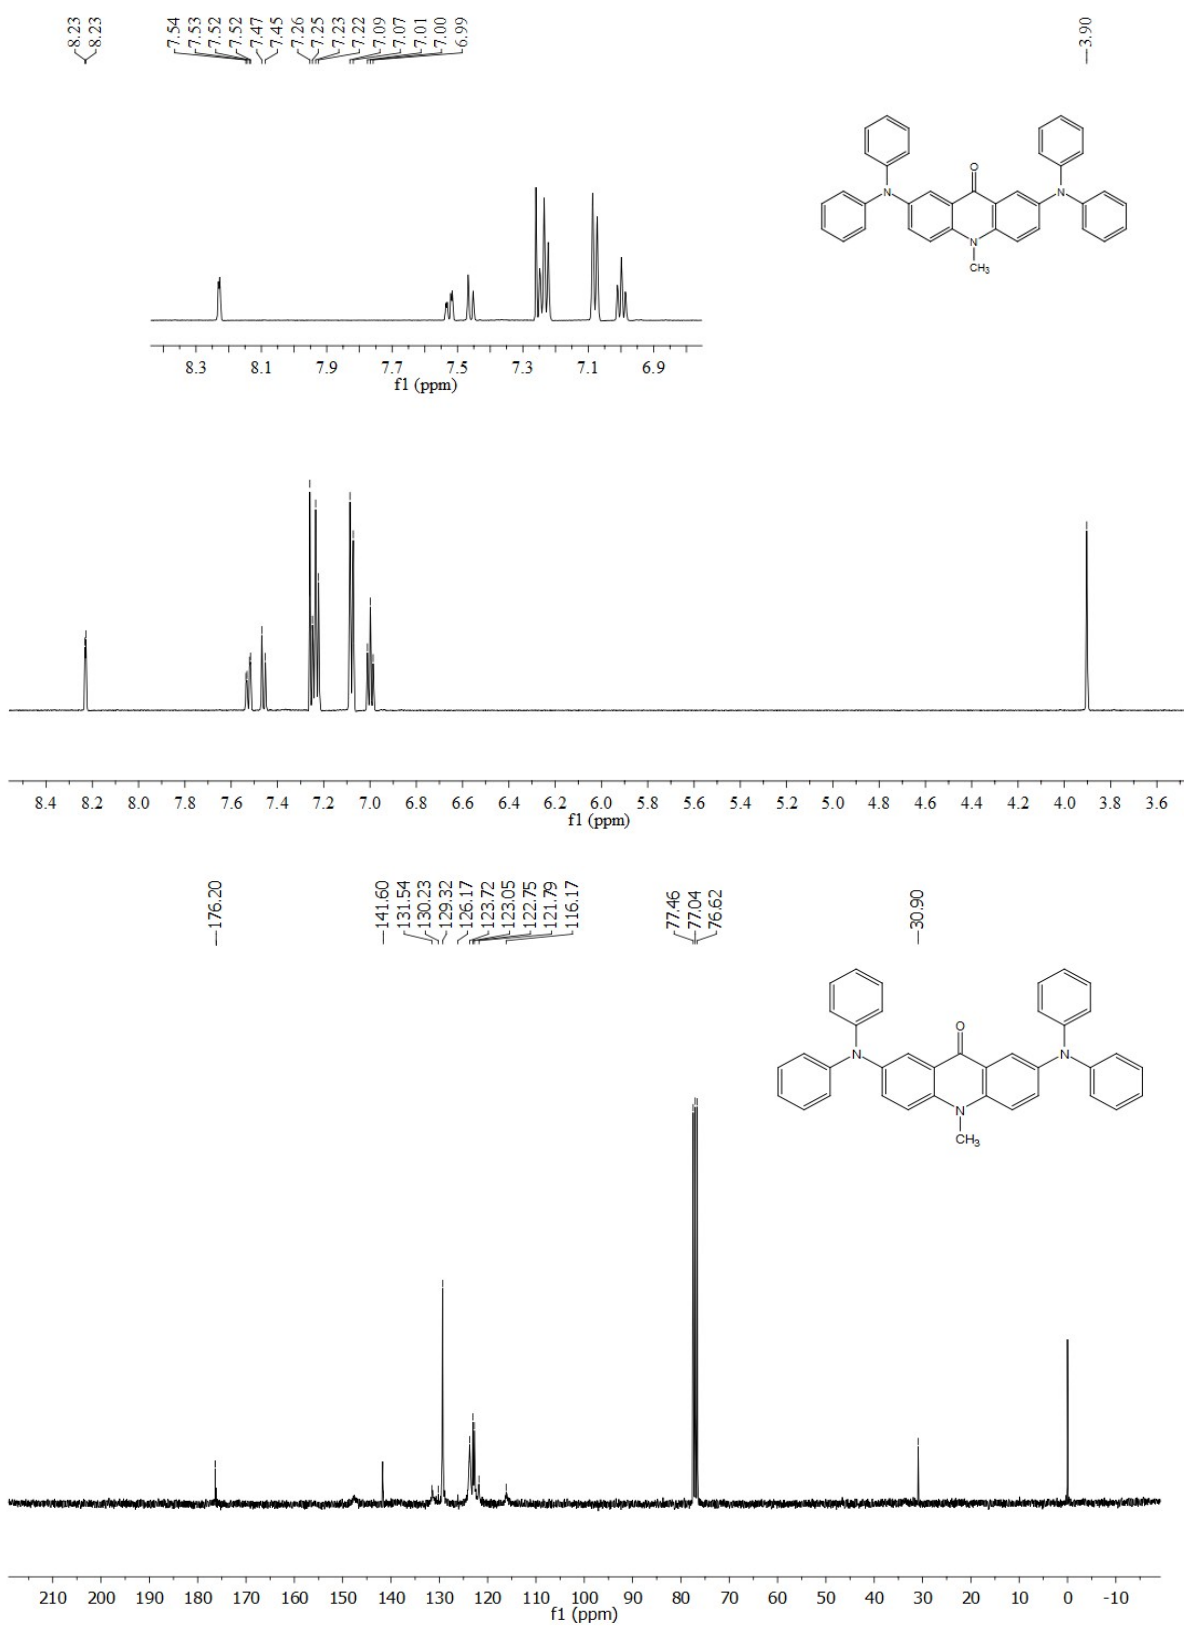

Figure S1: <sup>1</sup>H-NMR (above) and <sup>13</sup>C-NMR (below) spectra of 1 in CDCl<sub>3</sub>.

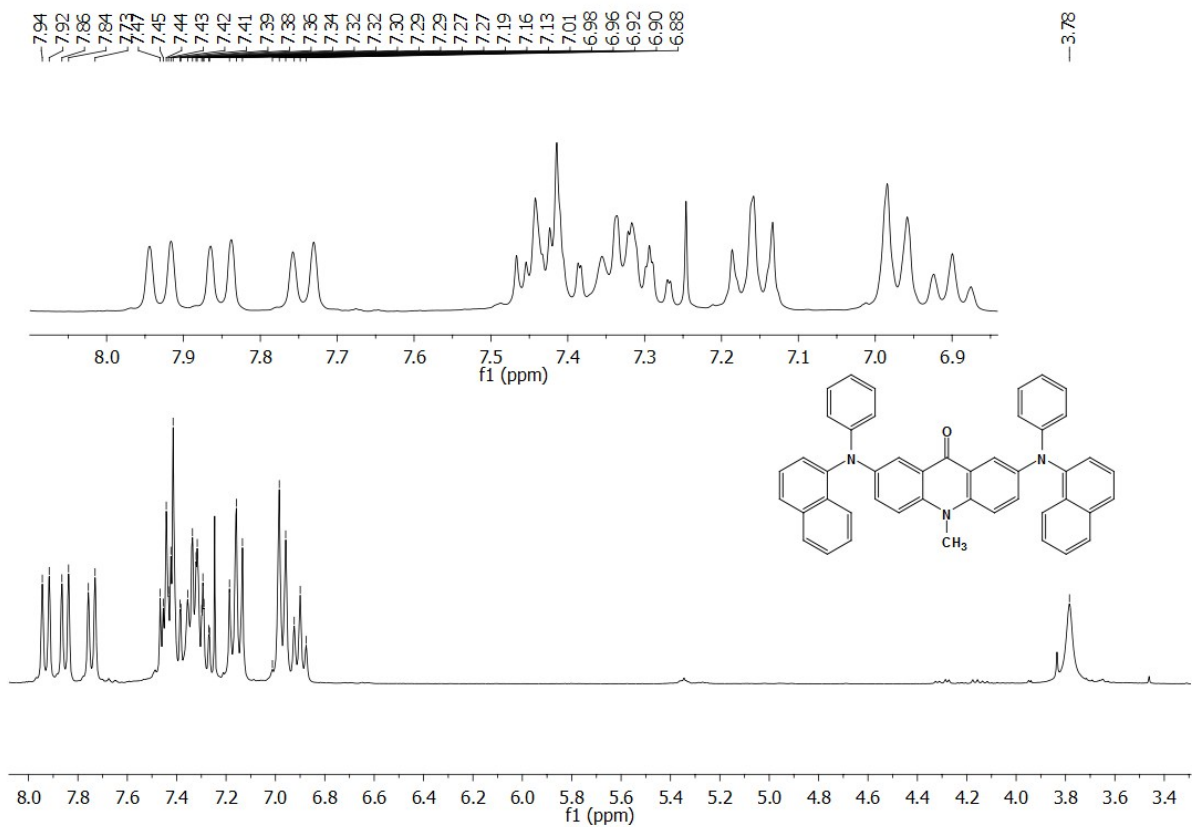

### <sup>1</sup>H NMR Spectra of compounds 2

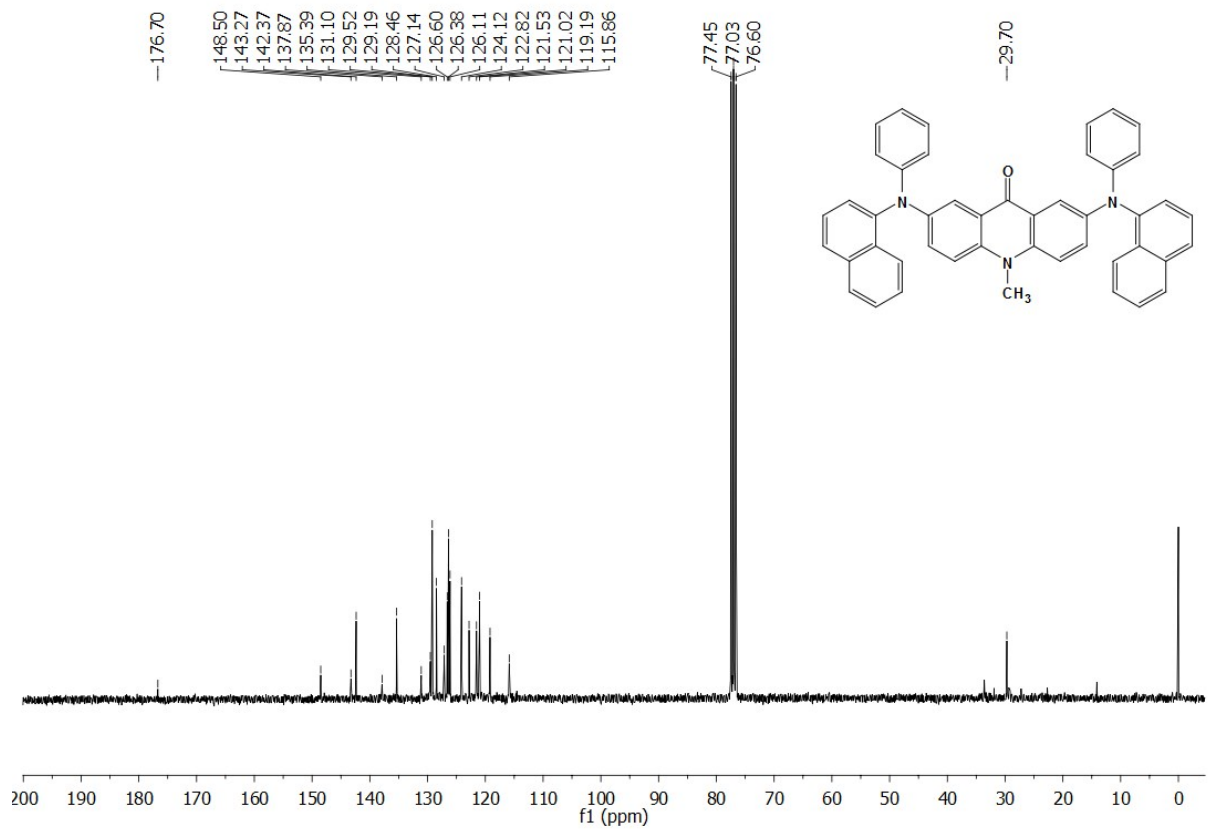

**Figure S2:** <sup>1</sup>H-NMR (above) and <sup>13</sup>C-NMR (below) spectra of **2** in CDCl<sub>3</sub>.

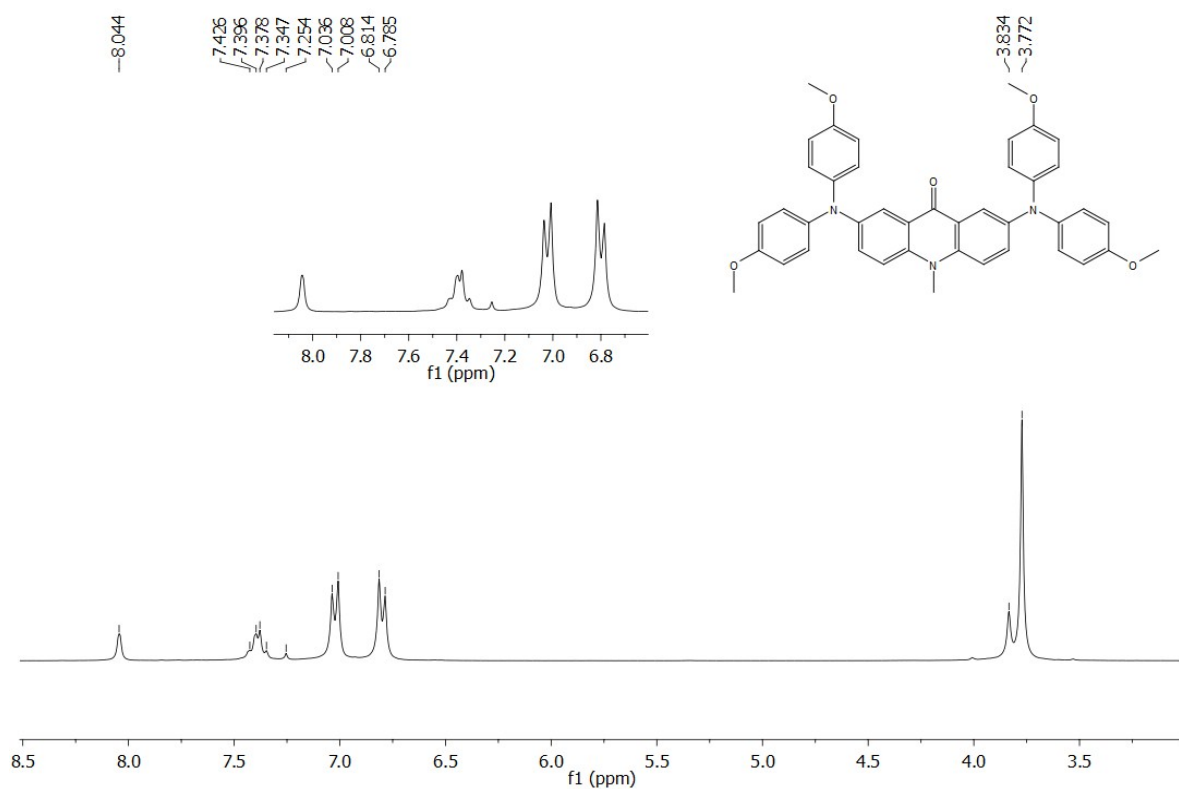

I

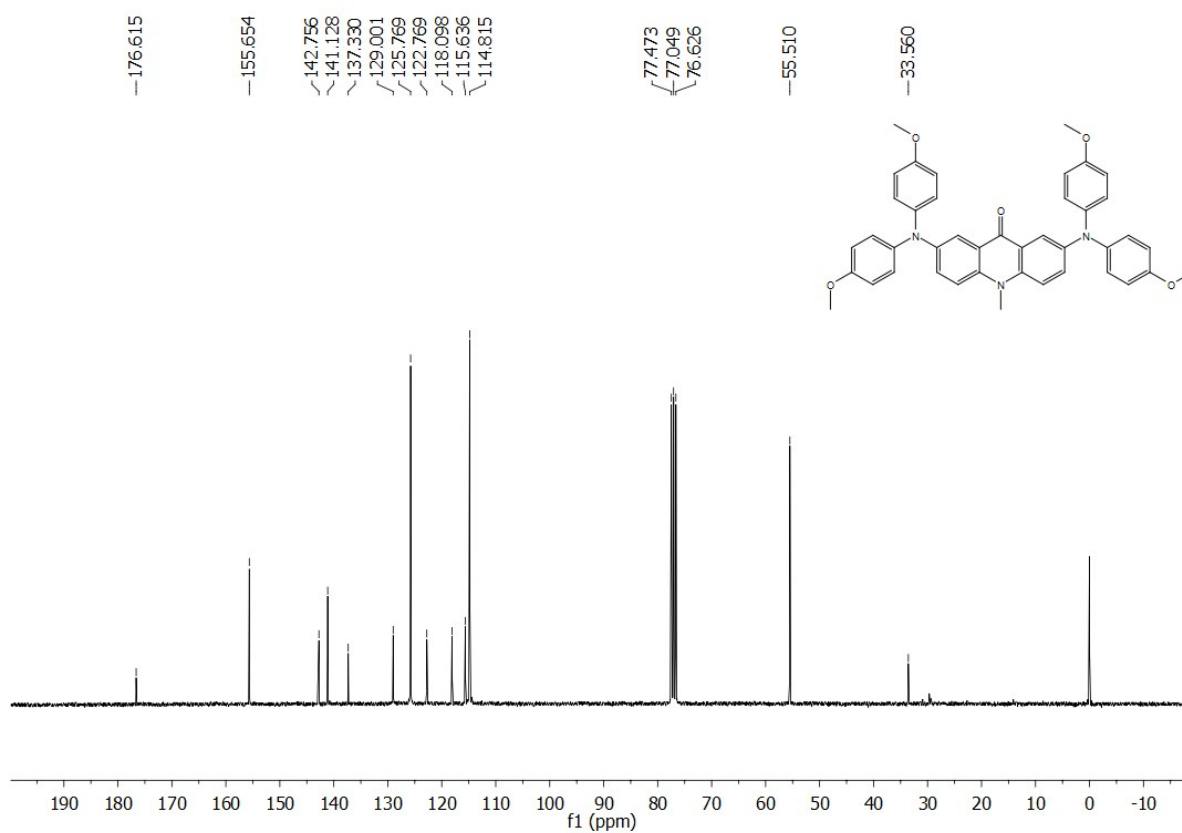

**Figure S3:** <sup>1</sup>H-NMR (above) and <sup>13</sup>C-NMR (below) spectra of **3** in CDCl<sub>3</sub>.

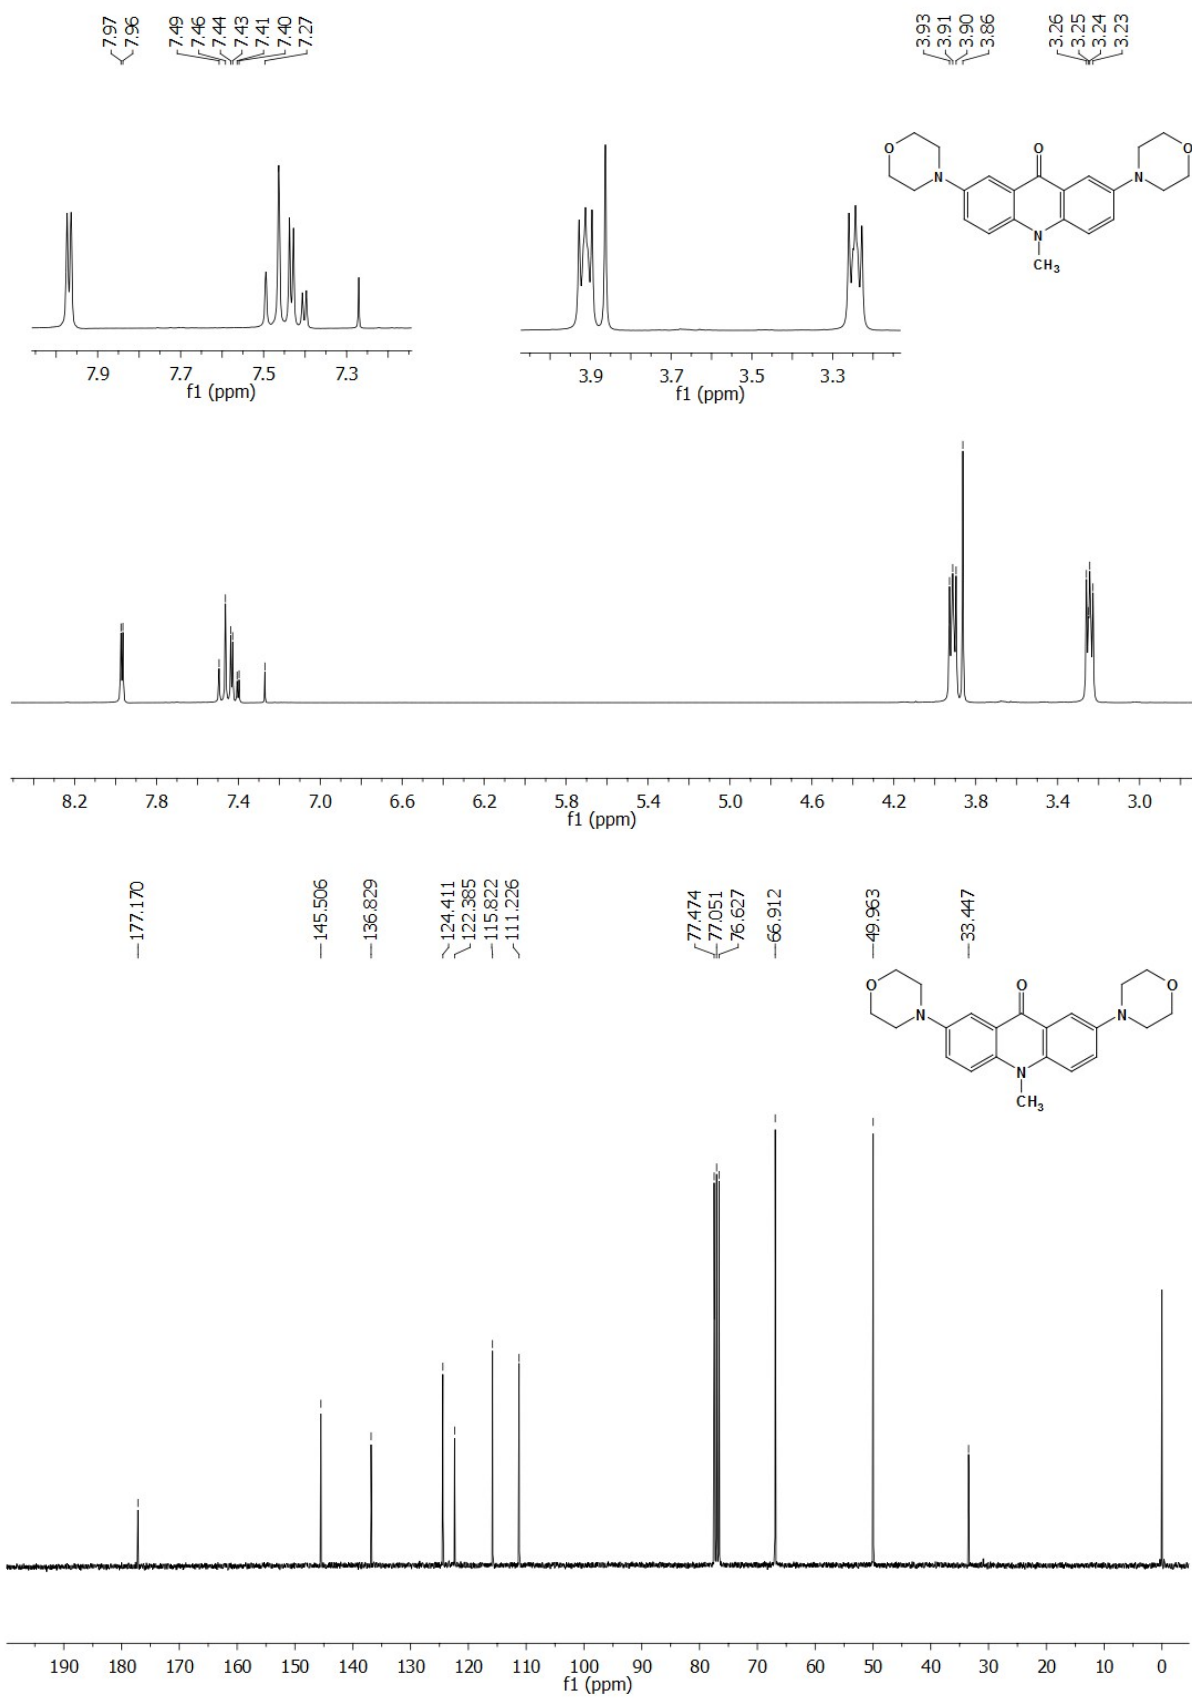

**Figure S4:**  $^1\text{H-NMR}$  (above) and  $^{13}\text{C-NMR}$  (below) spectra of **5** in  $\text{CDCl}_3$ .

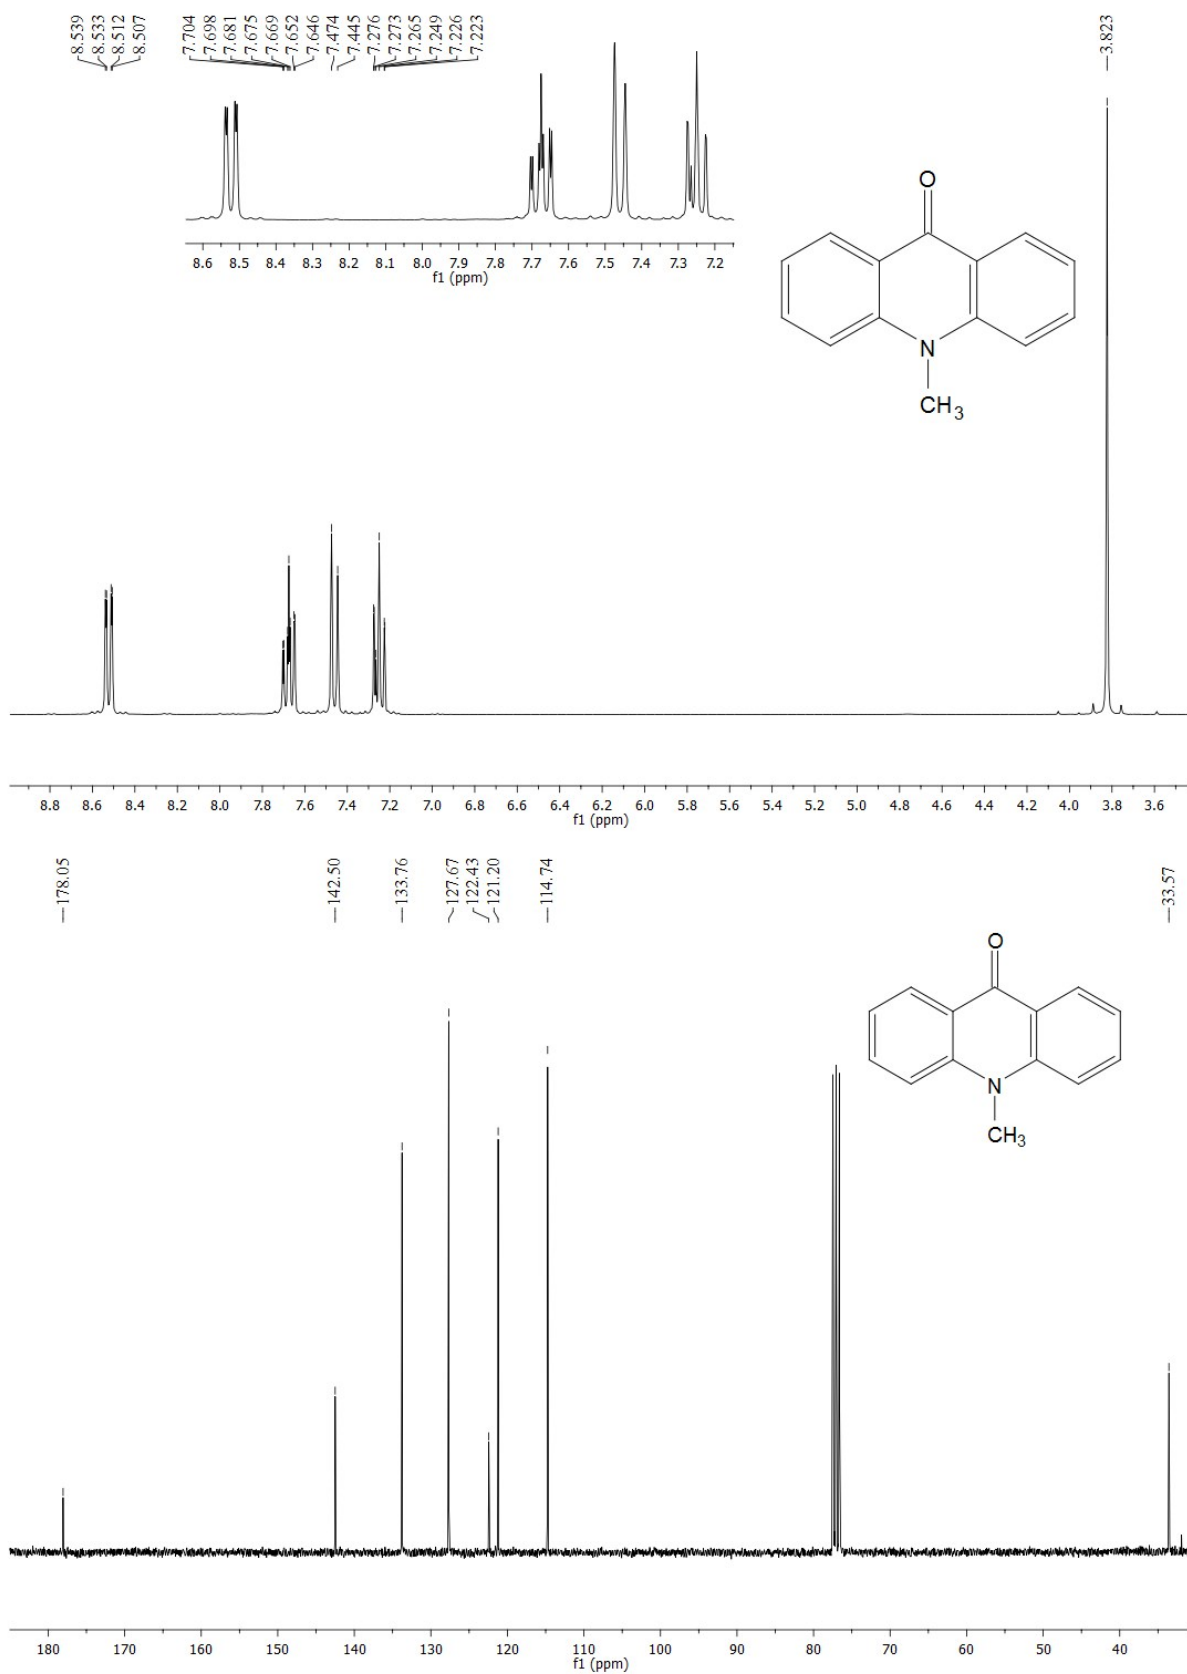

**Figure S5:** <sup>1</sup>H-NMR (above) and <sup>13</sup>C-NMR (below) spectra of **6** in CDCl<sub>3</sub>.



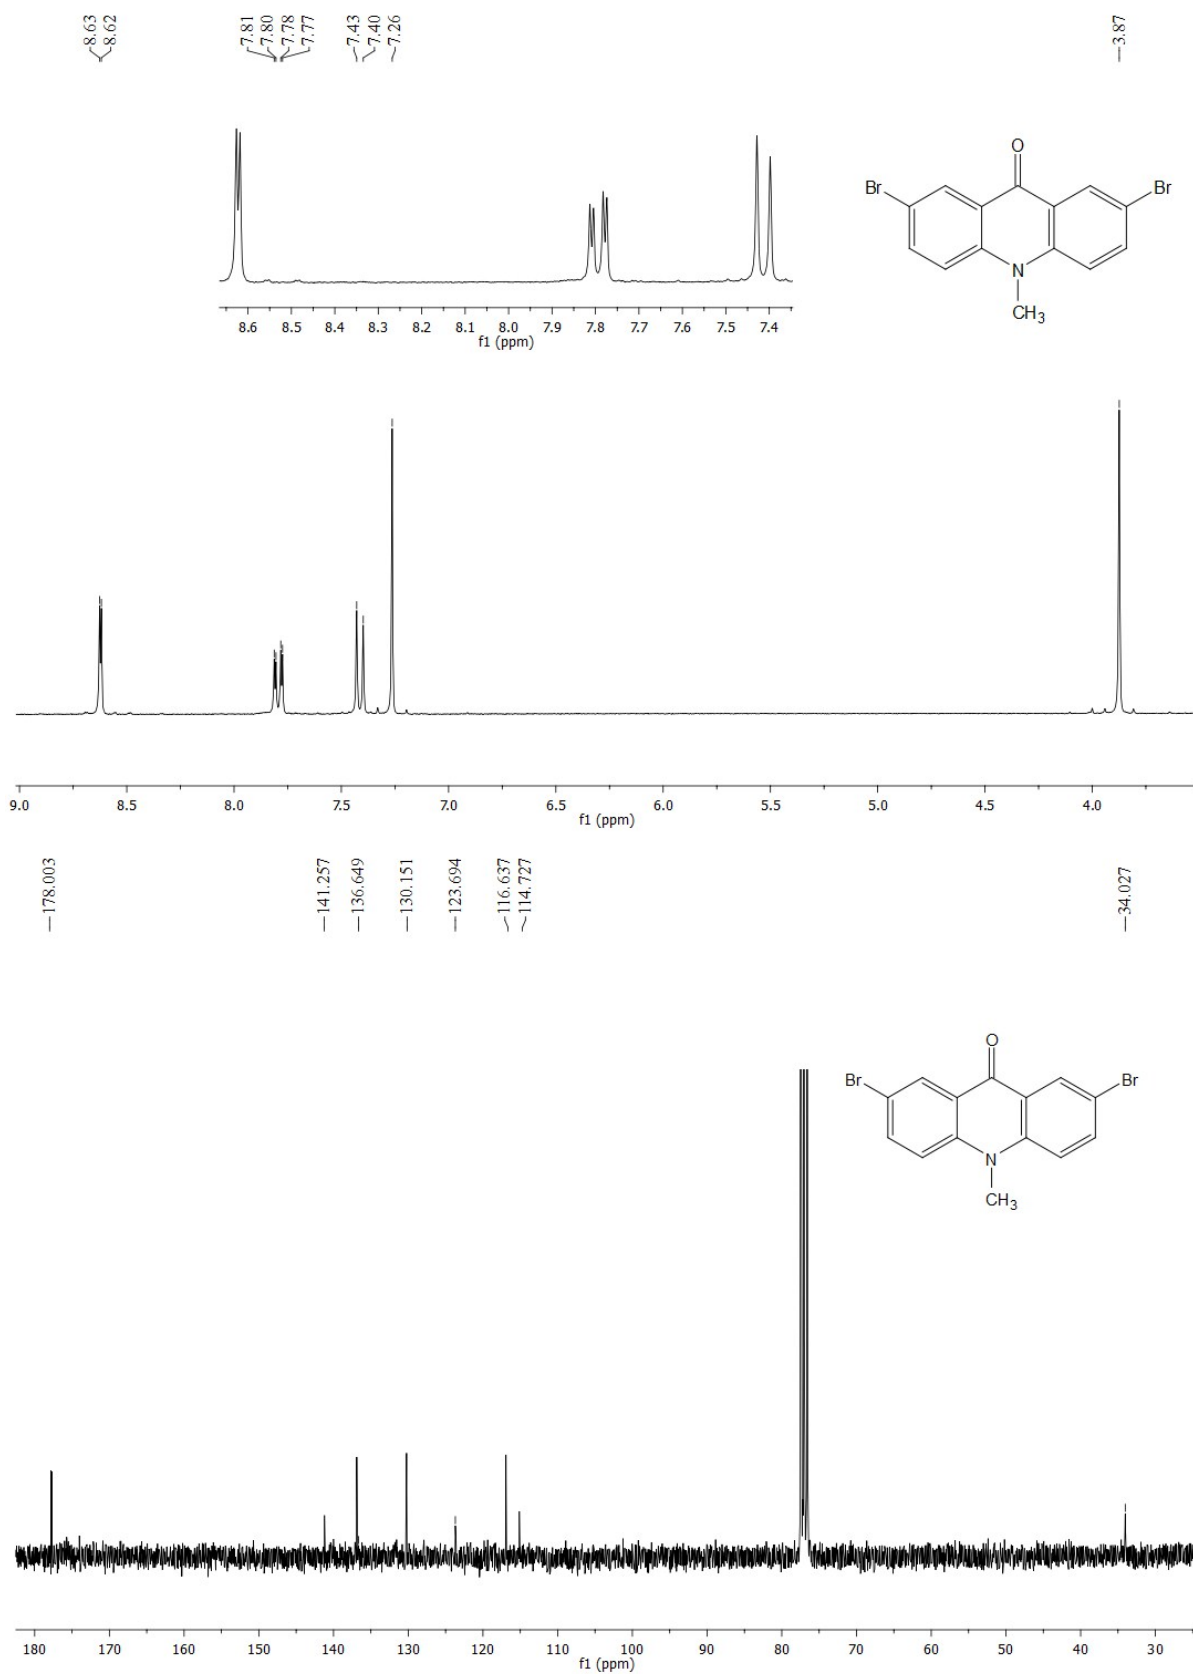

**Figure S6:**  $^1\text{H}$ -NMR (above) and  $^{13}\text{C}$ -NMR (below) spectra of **7** in  $\text{CDCl}_3$ .

## 2) MALDI-TOF mass of compound 1-5:

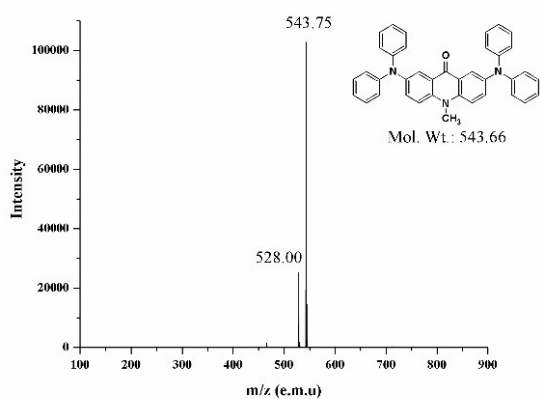

Figure S7: MALDI-TOF mass of 1

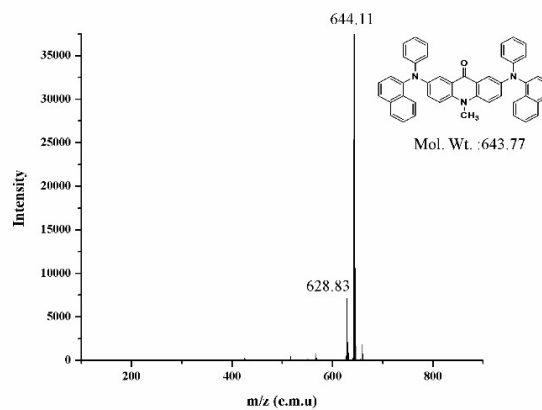

Figure S8: MALDI-TOF mass of 2

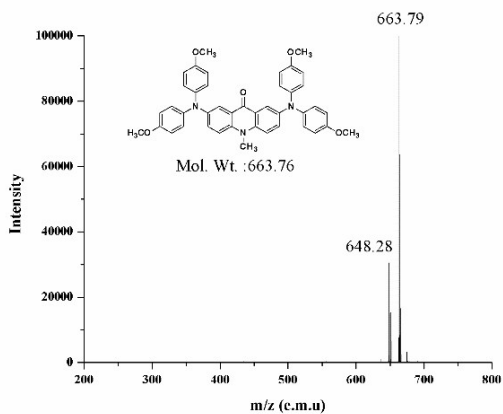

Figure S9: MALDI-TOF mass of 3

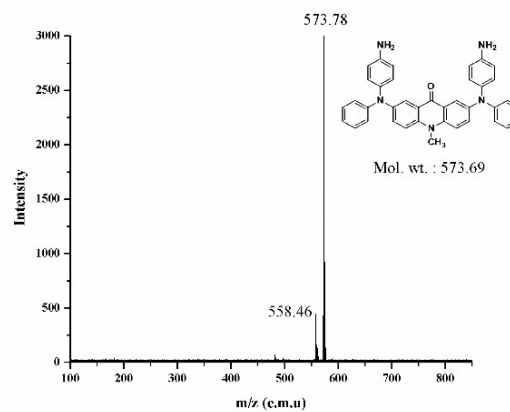

Figure S10: MALDI-TOF mass of 4

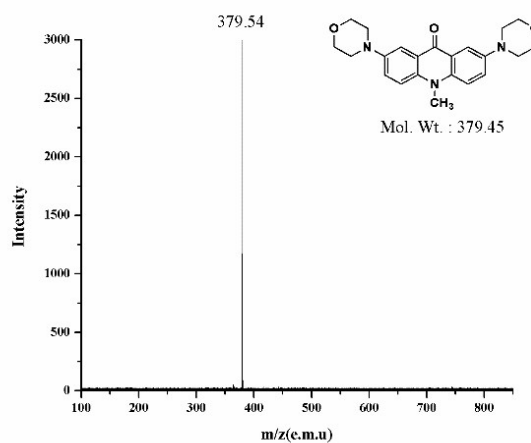

Figure S11: MALDI-TOF mass of 5

### 3) FT-IR Spectra of compound 1-5

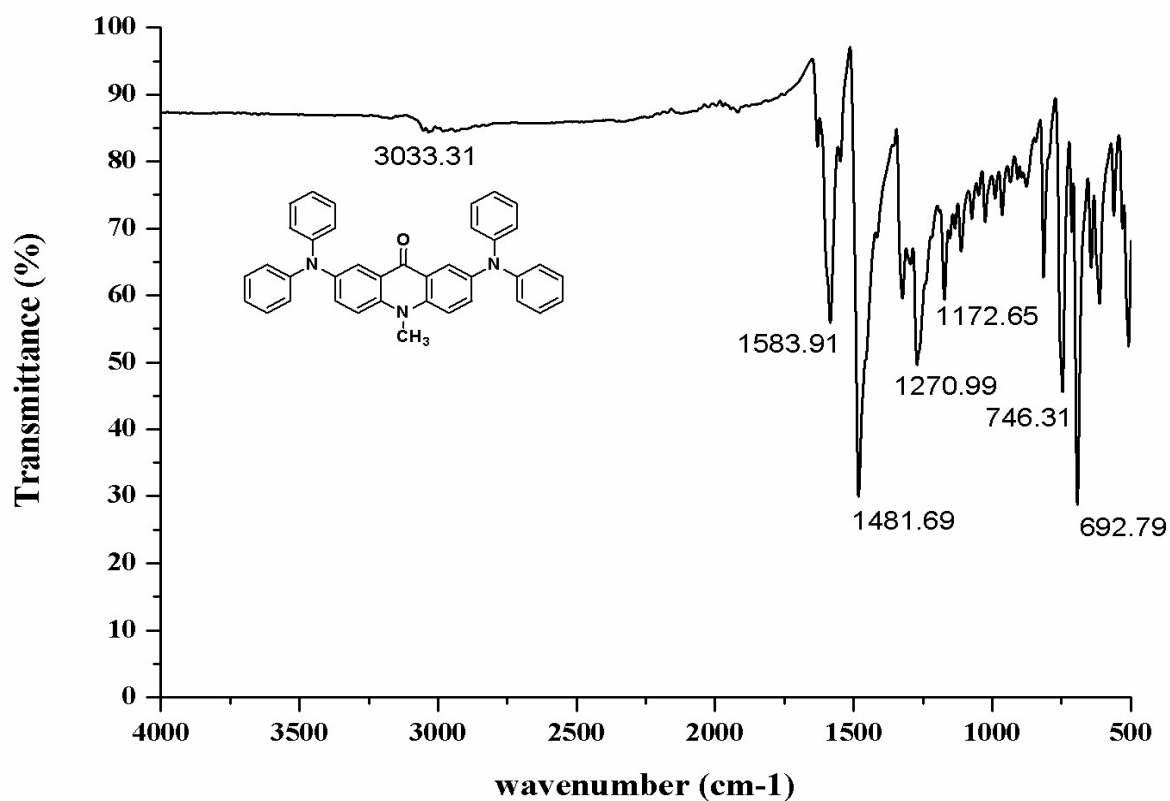

Figure S12: FTIR Spectra of 1.

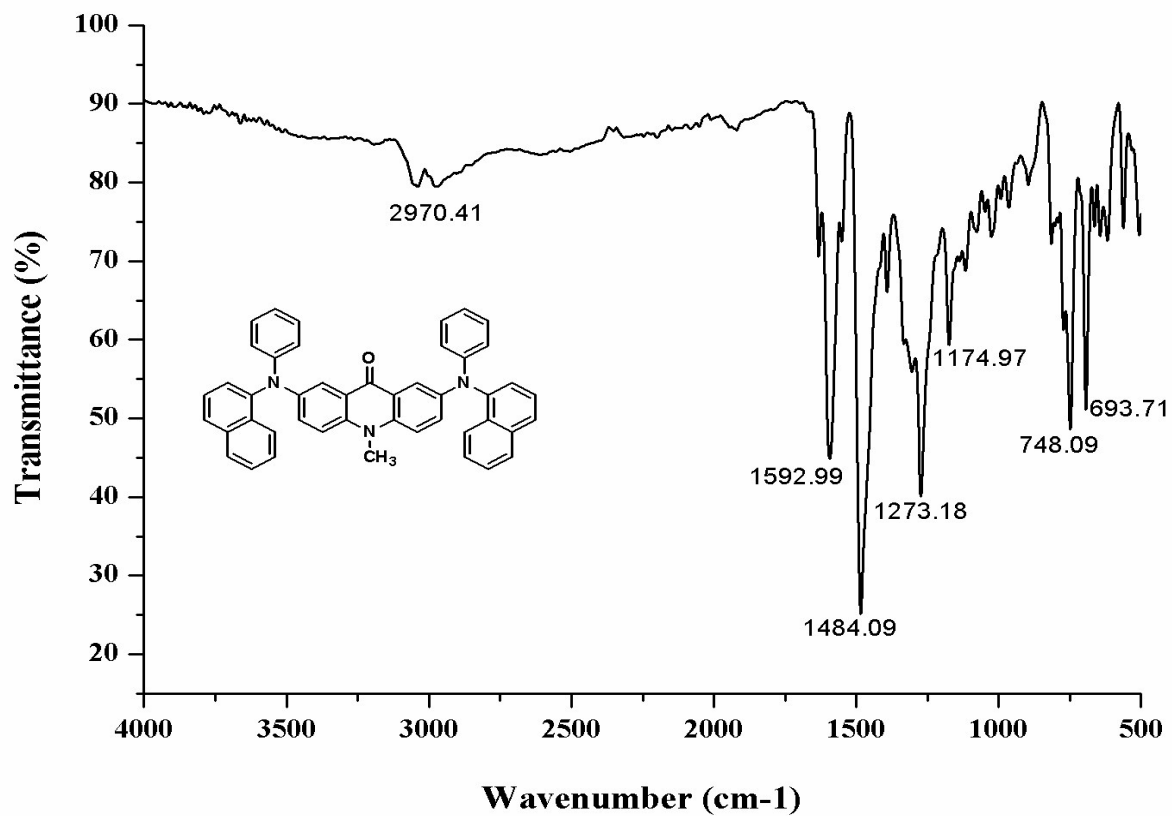

Figure S13: FTIR Spectra of 2.

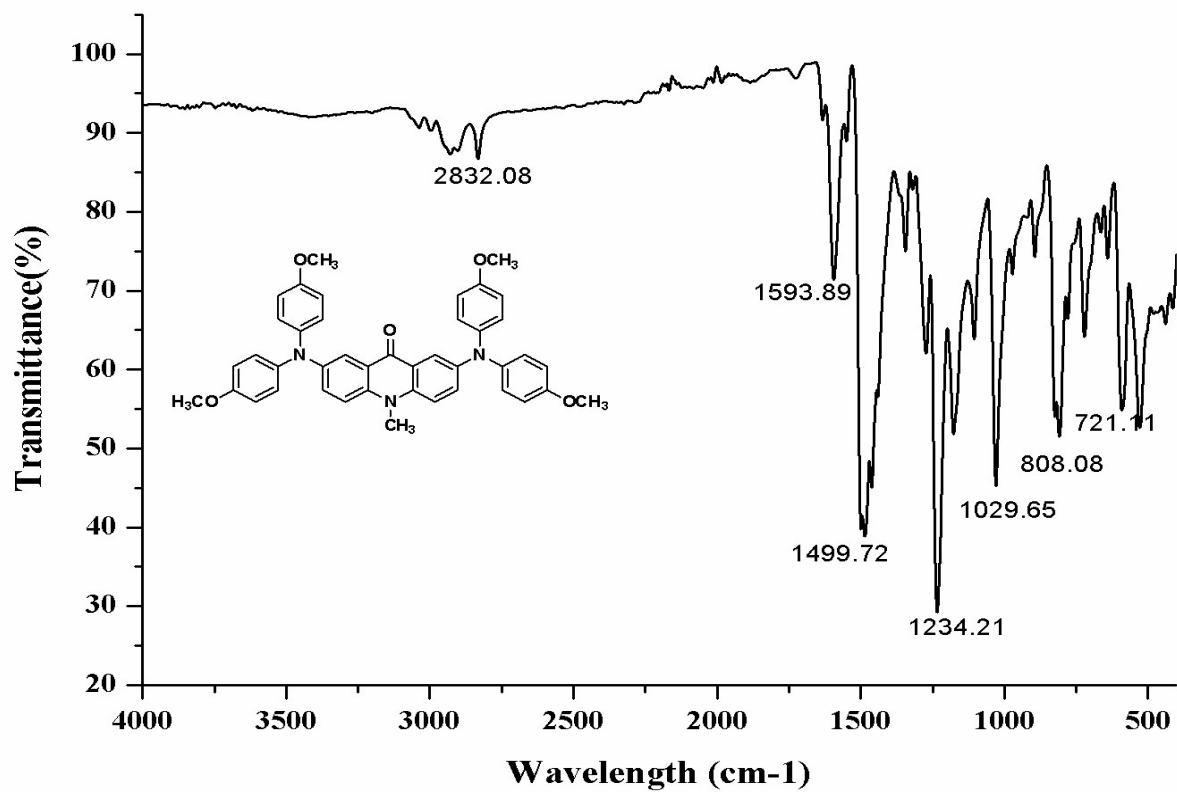

Figure S14: FTIR Spectra of 3.

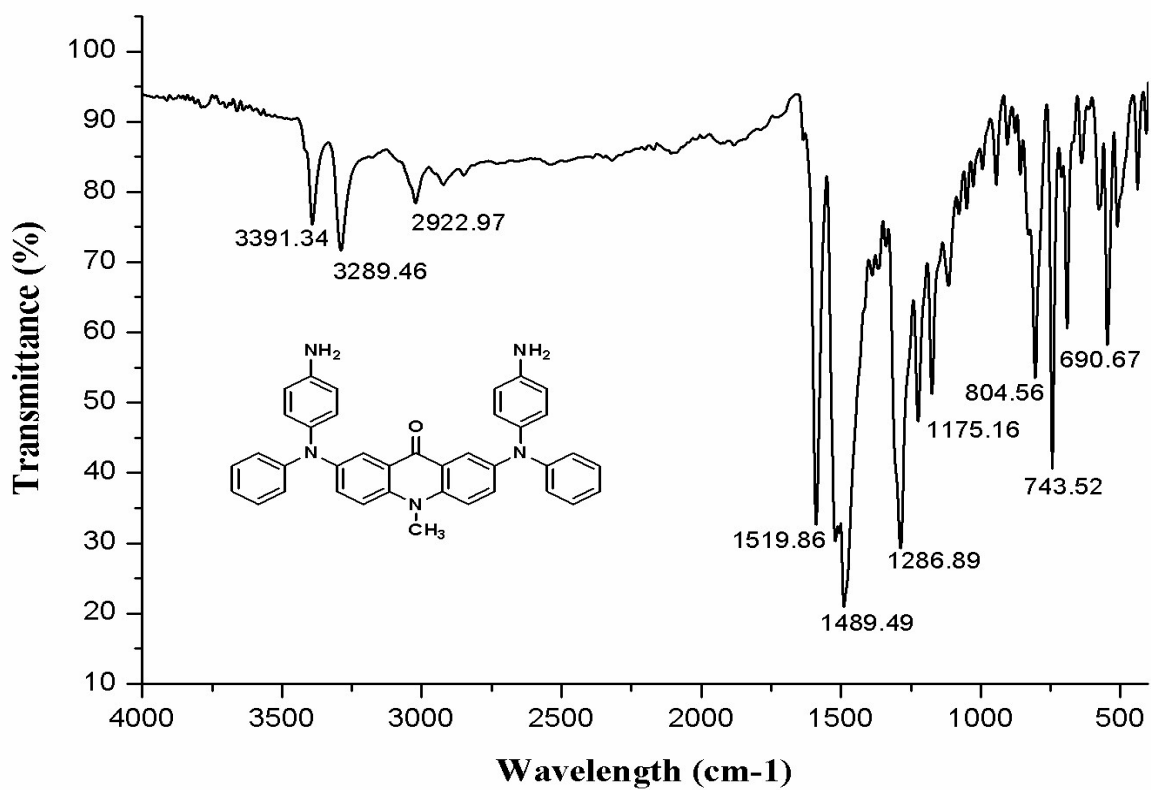

Figure S15: FTIR Spectra of 4.

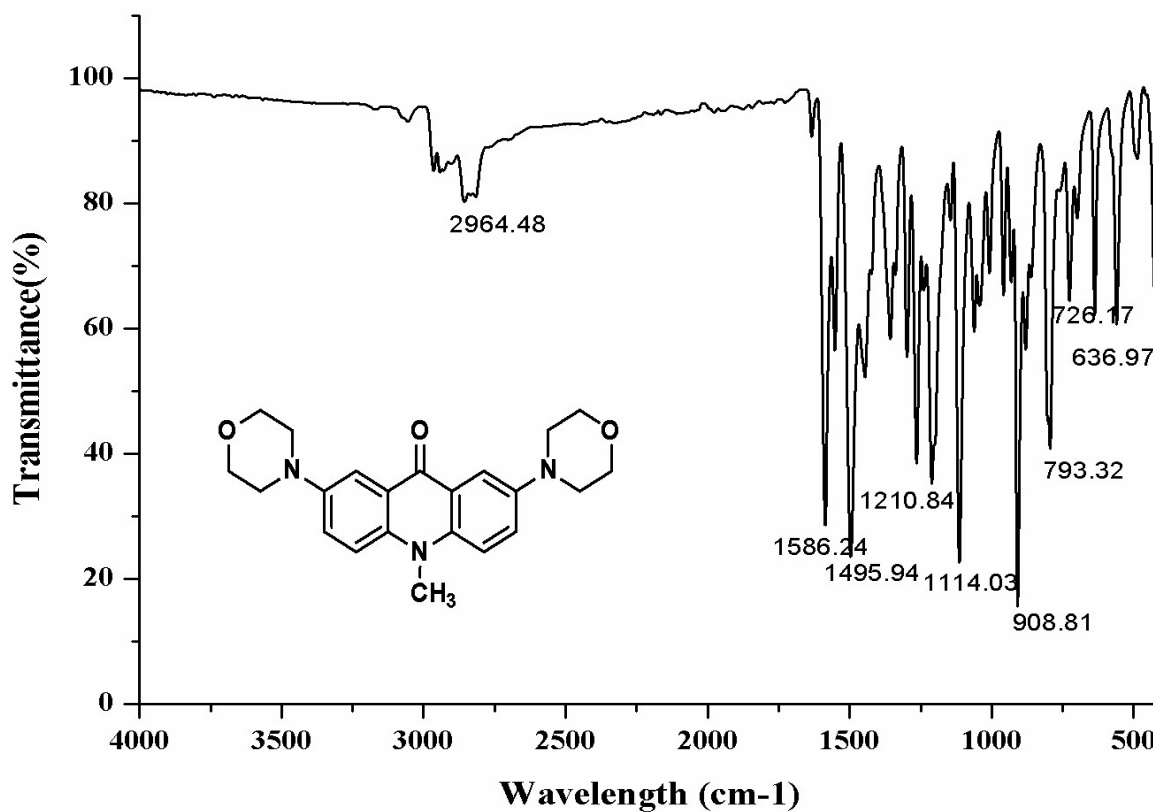

Figure S16: FTIR Spectra of 5.

4) Photophysical data of compound 1-5 in various solvents:

i) Photophysical data of 1 in various solvents:

| Solvent            | $\lambda_{\text{abs}}^{\text{a}}$ ,<br>nm | $\lambda_{\text{em}}^{\text{c}}$ ,<br>nm | Stokes shift <sup>d</sup> ,<br>cm <sup>-1</sup> | $E_g^{\text{opt}}$<br>eV |
|--------------------|-------------------------------------------|------------------------------------------|-------------------------------------------------|--------------------------|
| Toluene            | 303, 348, 397, 458                        | 501                                      | 1873.98                                         | 2.55                     |
| Dichloromethane    | 303, 348, 401, 462                        | 522                                      | 2487.93                                         | 2.51                     |
| Ethyl acetate      | 299, 344, 392, 451                        | 504                                      | 2331.67                                         | 2.62                     |
| Acetonitrile       | 305, 344, 396, 458                        | 520                                      | 2603.29                                         | 2.53                     |
| Dimethylsulphoxide | 301, 349, 400, 463                        | 523                                      | 2477.81                                         | 2.54                     |

ii) Photophysical data of **2** in various solvents:

| Solvent            | $\lambda_{\text{abs}}^{\text{a}}$ ,<br>nm | $\lambda_{\text{em}}^{\text{c}}$ ,<br>nm | Stokes shift <sup>d</sup> ,<br>cm <sup>-1</sup> | $E_g^{\text{opt}}$<br>eV |
|--------------------|-------------------------------------------|------------------------------------------|-------------------------------------------------|--------------------------|
| Toluene            | 338, 360, 459                             | 500                                      | 1786.49                                         | 2.55                     |
| Dichloromethane    | 339, 359, 461                             | 519                                      | 2424.15                                         | 2.54                     |
| Ethyl acetate      | 335, 355, 443                             | 501                                      | 2613.28                                         | 2.67                     |
| Acetonitrile       | 336, 351, 450                             | 517                                      | 2879.86                                         | 2.56                     |
| Dimethylsulphoxide | 340, 359, 455                             | 518                                      | 2673.00                                         | 2.56                     |

iii) Photophysical data of **3** in various solvents:

| Solvent            | $\lambda_{\text{abs}}^{\text{a}}$ , nm | $\lambda_{\text{em}}^{\text{c}}$ , nm | Stokes shift <sup>d</sup> ,<br>cm <sup>-1</sup> | $E_g^{\text{opt}}$<br>eV |
|--------------------|----------------------------------------|---------------------------------------|-------------------------------------------------|--------------------------|
| Toluene            | 303, 353, 415, 478                     | 528                                   | 1981.10                                         | 2.44                     |
| Dichloromethane    | 301, 351, 416, 483                     | 558                                   | 2782.78                                         | 2.30                     |
| Ethyl acetate      | 299, 348, 406, 470                     | 527                                   | 2301.26                                         | 2.50                     |
| Acetonitrile       | 301, 346, 412, 478                     | 558                                   | 2999.35                                         | 2.46                     |
| Dimethylsulphoxide | 301, 351, 416, 483                     | 540                                   | 2185.41                                         | 2.53                     |

iv) Photophysical data of **4** in various solvents:

| Solvent            | $\lambda_{\text{abs}}^{\text{a}}$ , nm | $\lambda_{\text{em}}^{\text{c}}$ , nm | Stokes shift <sup>d</sup> ,<br>cm <sup>-1</sup> | $E_g^{\text{opt}}$<br>eV |
|--------------------|----------------------------------------|---------------------------------------|-------------------------------------------------|--------------------------|
| Toluene            | 310, 338, 460                          | 519                                   | 2471.30                                         | 2.55                     |
| Dichloromethane    | 312, 339, 392, 464                     | 522                                   | 2394.63                                         | 2.63                     |
| Ethyl acetate      | 313, 340, 390, 463                     | 517                                   | 2255.91                                         | 2.62                     |
| Acetonitrile       | 310, 339, 393, 462                     | 522                                   | 2487.93                                         | 2.66                     |
| Dimethylsulphoxide | 318, 351, 408, 488                     | 527                                   | 1516.47                                         | 2.62                     |

v) Photophysical data of **5** in various solvents:

| Solvent            | $\lambda_{\text{abs}}^{\text{a}}$ , nm | $\lambda_{\text{em}}^{\text{c}}$ , nm | Stokes shift <sup>d</sup> ,<br>cm <sup>-1</sup> | $E_g^{\text{opt}}$<br>eV |
|--------------------|----------------------------------------|---------------------------------------|-------------------------------------------------|--------------------------|
| Toluene            | 309, 362, 446                          | 512                                   | 2890.27                                         | 2.66                     |
| Dichloromethane    | 308, 360, 448                          | 523                                   | 3200.00                                         | 2.56                     |
| Ethyl acetate      | 305, 355, 439                          | 513                                   | 3285.86                                         | 2.63                     |
| Acetonitrile       | 307, 360, 445                          | 525                                   | 3424.29                                         | 2.57                     |
| Dimethylsulphoxide | 311, 364, 450                          | 529                                   | 3318.63                                         | 2.55                     |

5) Absorption and Emission spectra of compound 1-5 in various solvents:-

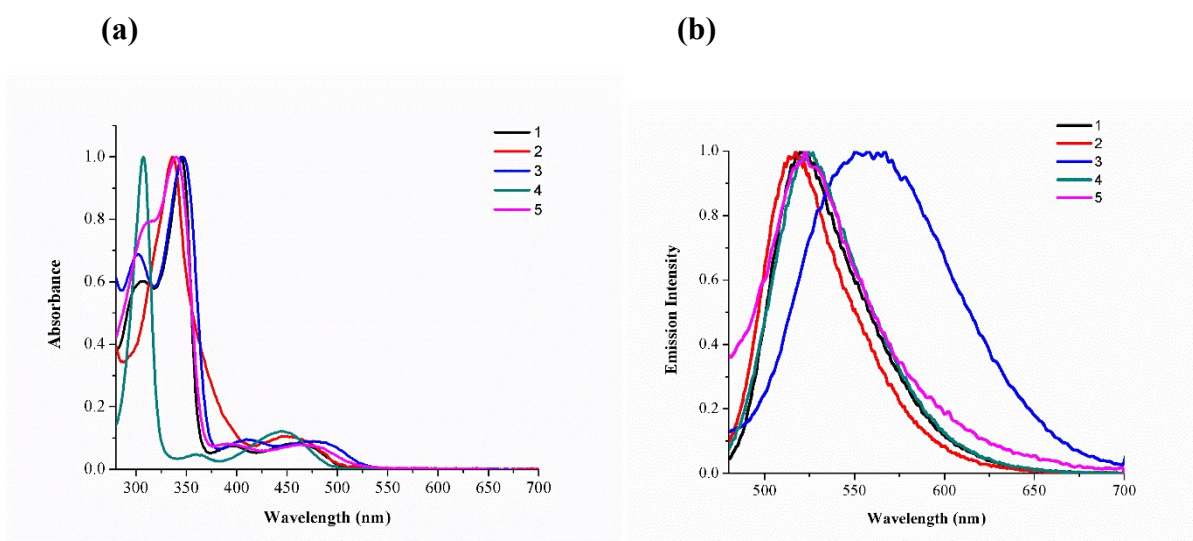

Figure S17: Absorption spectra (a) and Emission spectra (b) of 1-5 in dichloromethane.

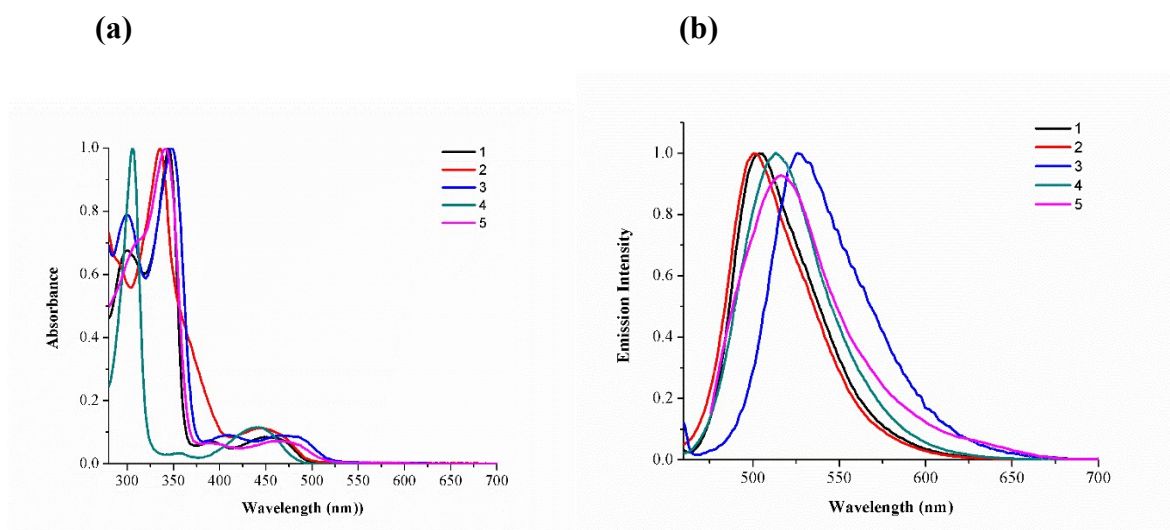

Figure S18: Absorption spectra (a) and Emission spectra (b) of 1-5 in ethyl acetate.

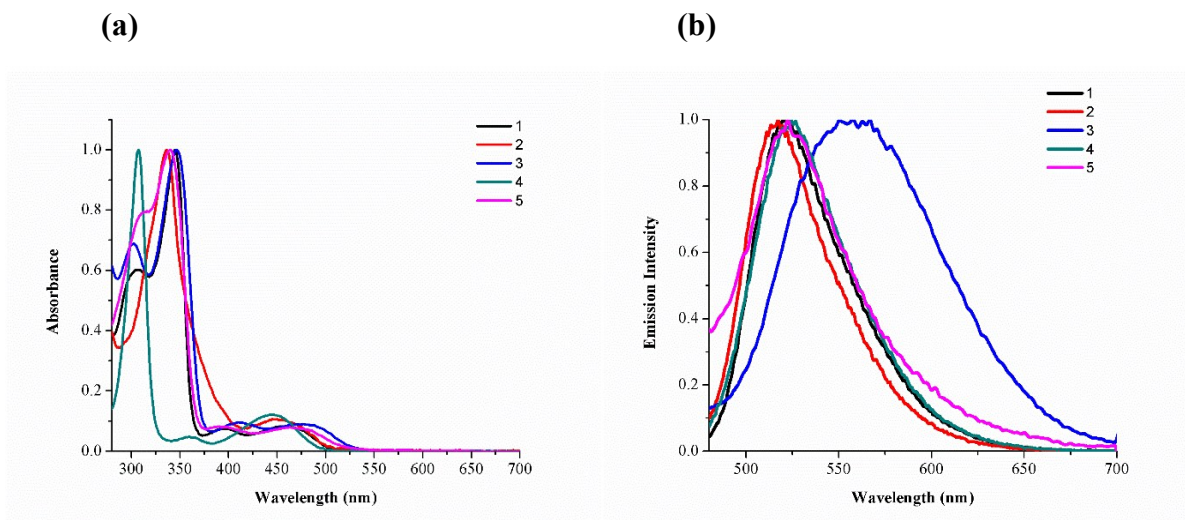

**Figure S19:** Absorption spectra (a) and Emission spectra (b) of 1-5 in **Acetonitrile**.

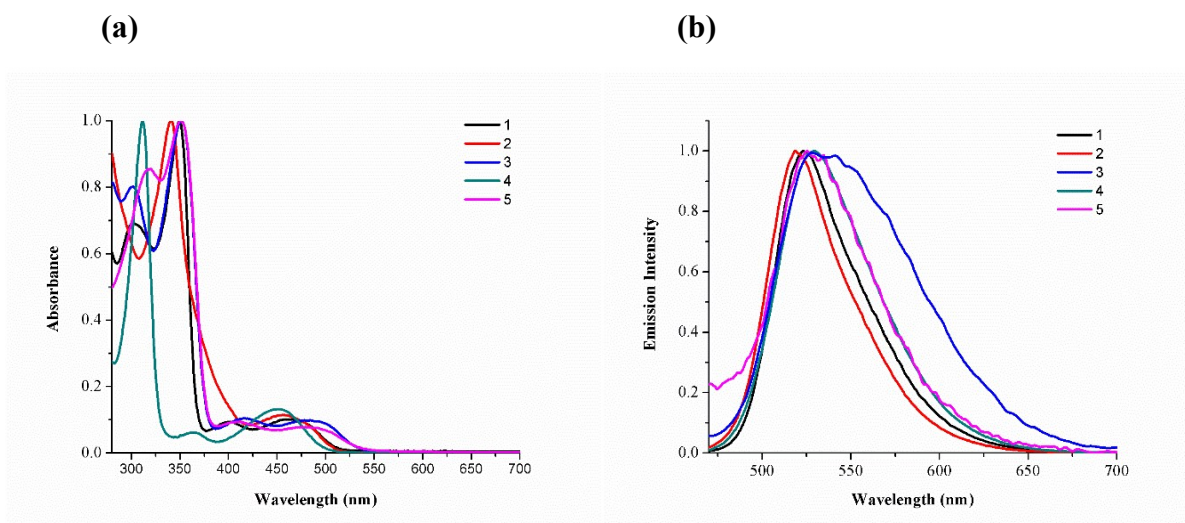

**Figure S20:** Absorption spectra (a) and Emission spectra (b) of 1-5 in **dimethylsulphoxide**



6) Life time measurement spectra of compounds 1-5 in toluene:

Table 2: Life time data of 1-5 in toluene

| Compound | Wavelength (nm) | $\tau_1$ ns ( $a_1$ ) | $\tau_2$ ns ( $a_2$ ) |
|----------|-----------------|-----------------------|-----------------------|
| 1        | 475             | 1.16 (0.86)           | 11.83 (0.14)          |
|          | 501             | 1.20 (0.23)           | 13.44 (0.77)          |
|          | 580             | 1.05 (0.05)           | 13.75 (0.95)          |
| 2        | 480             | 1.14 (0.23)           | 11.29 (0.77)          |
|          | 500             | 1.34 (0.07)           | 12.2 (0.93)           |
|          | 560             | 12.32                 | ----                  |
| 3        | 490             | 1.16 (0.84)           | 10.72 (0.16)          |
|          | 527             | 1.49 (0.11)           | 12.56 (0.89)          |
|          | 560             | 1.51 (0.03)           | 12.63 (0.97)          |
| 4        | 490             | 1.1 (0.86)            | 5 (0.14)              |
|          | 518             | 1.49 (0.8)            | 5 (0.2)               |
|          | 560             | 1.94 (0.88)           | 8.31 (0.12)           |
| 5        | 490             | 1.15 (0.74)           | 11.3 (0.26)           |
|          | 512             | 1.18 (0.37)           | 12.22 (0.63)          |
|          | 560             | 1.11 (0.15)           | 12.28 (0.85)          |

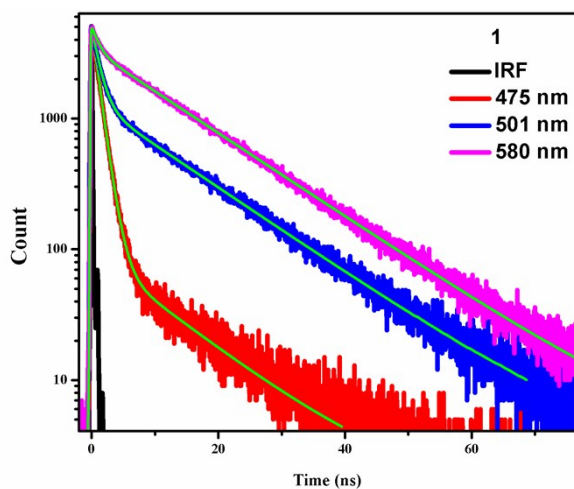

Figure S21: Life time spectra of 1.

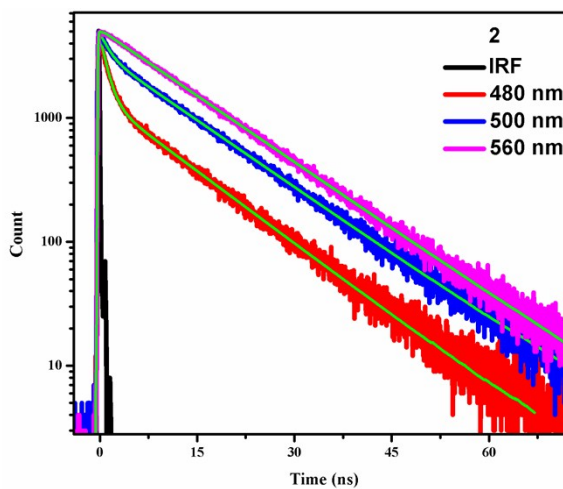

Figure S22: Life time spectra of 2.

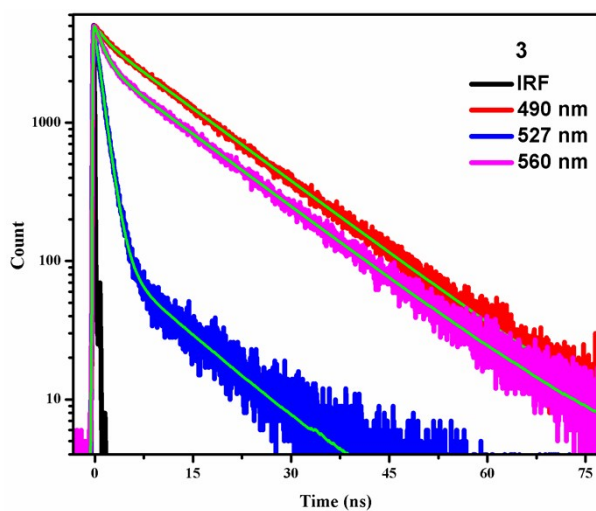

Figure S23: Life time spectra of 3.

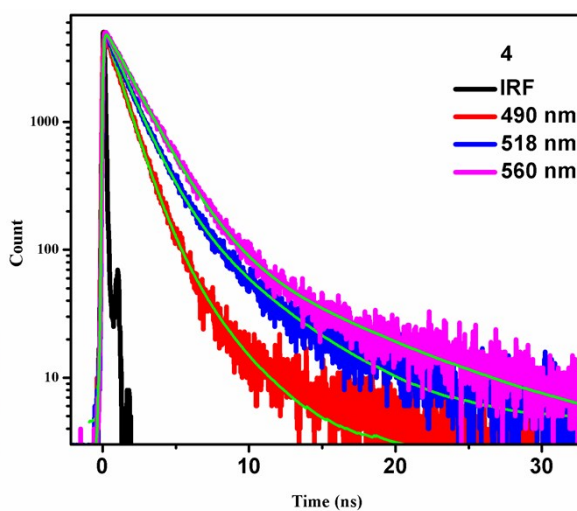

Figure S24: Life time spectra of 4

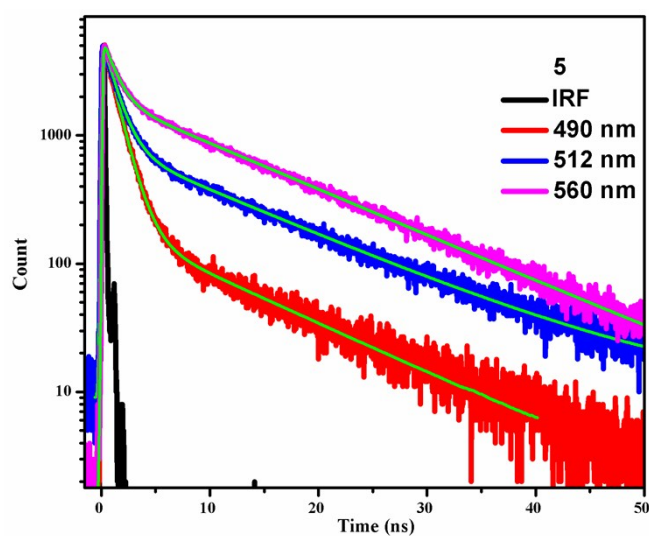

Figure S25: Life time spectra of 5.

7) Cyclic voltammetry and differential pulse voltammetry of compounds 1-5 in acetonitrile :-

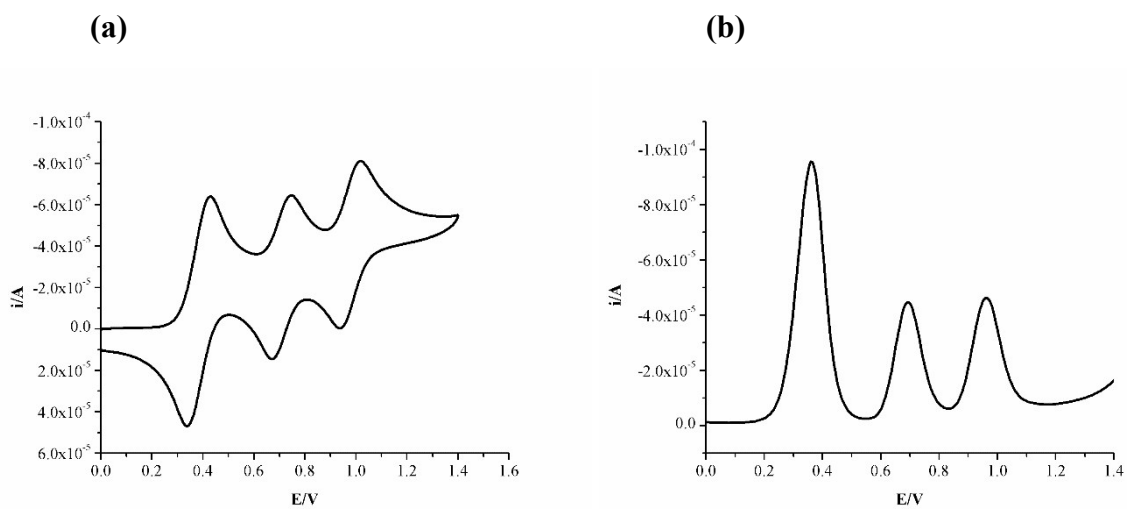

Figure S26: Cyclic voltammetry (a) and differential pulse voltammetry (b) of 1

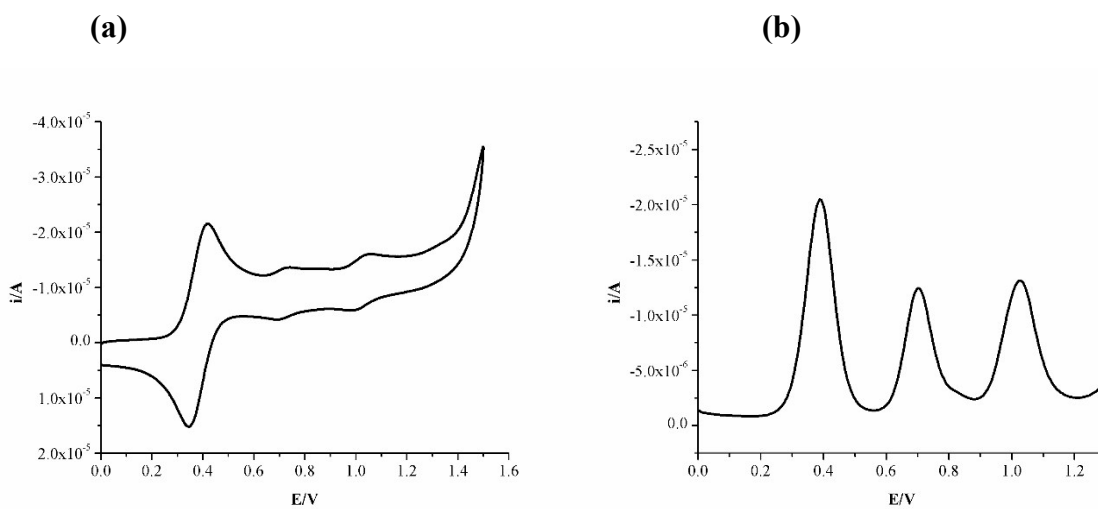

Figure S27: Cyclic voltammetry (a) and differential pulse voltammetry (b) of 2

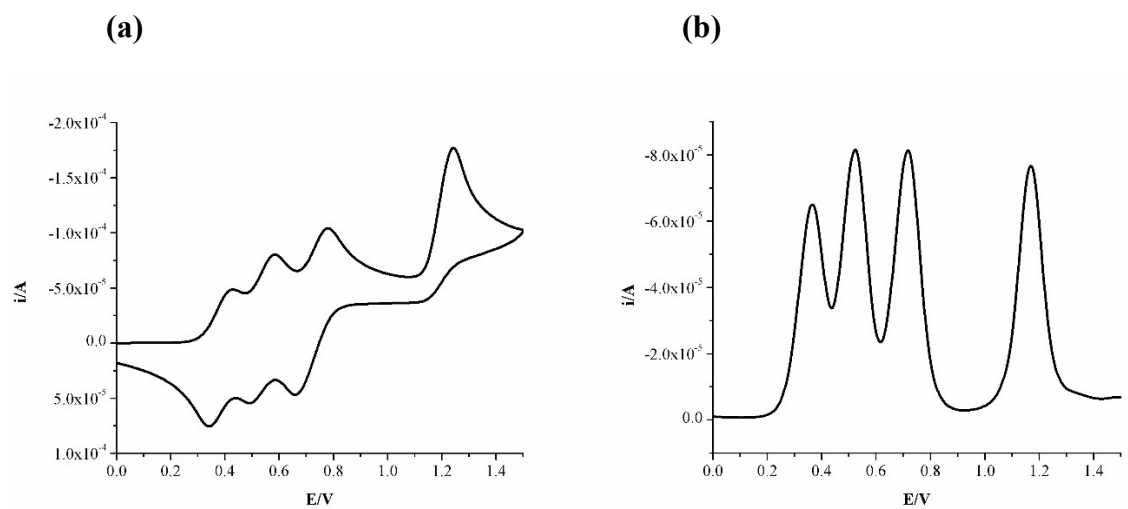

**Figure S28:** Cyclic voltammety (a) and differential pulse voltammety (b) of **3**

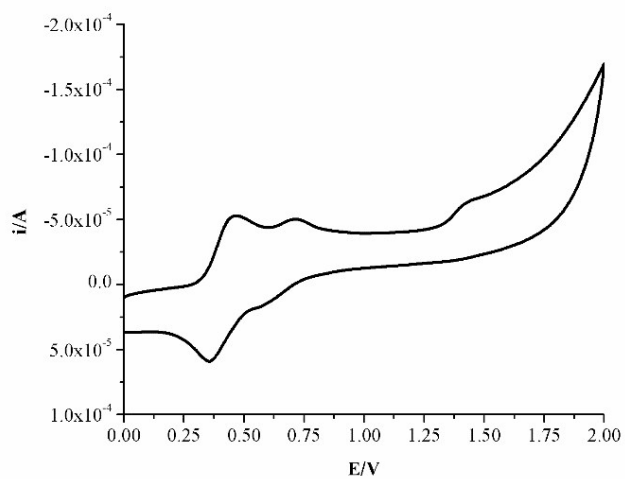

**Figure S29:** Cyclic voltammety of **4**:

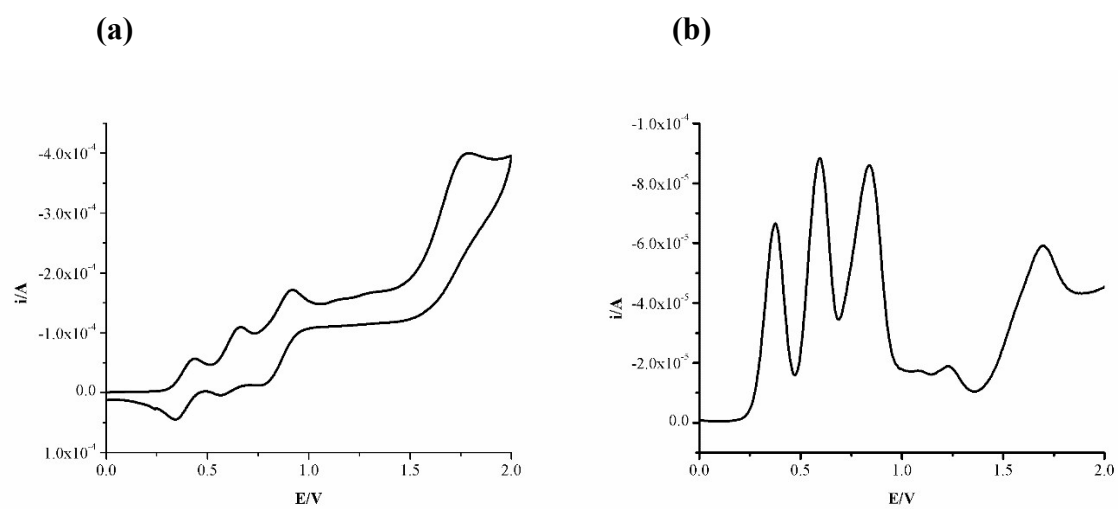

**Figure S30:** Cyclic voltammetry (a) and differential pulse voltammetry (b) of **5**:

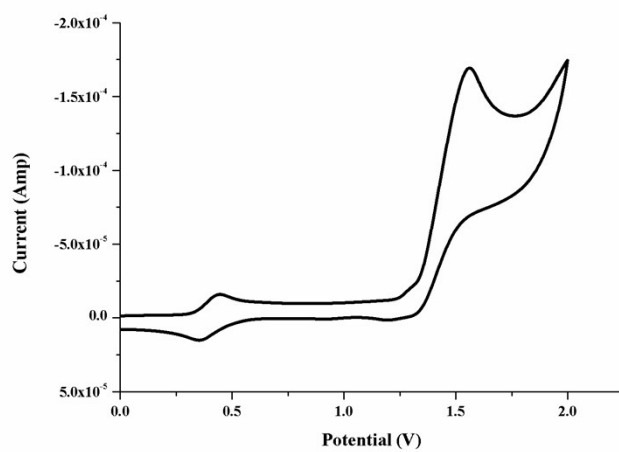

**Figure S31:** Cyclic voltammetry of **6** (9-methylacridone):

8) Thermo-Gravimetric (TG) and Differential thermogravimetric (DTG) plots of compounds 1-5 :-

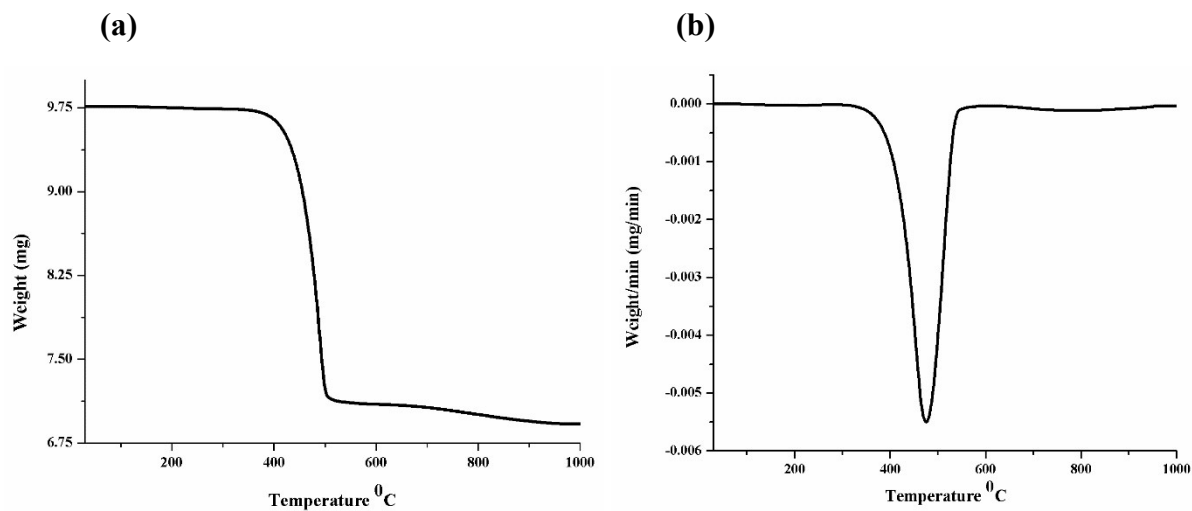

Figure S32: TG (a) and DTG (b) plots of 1

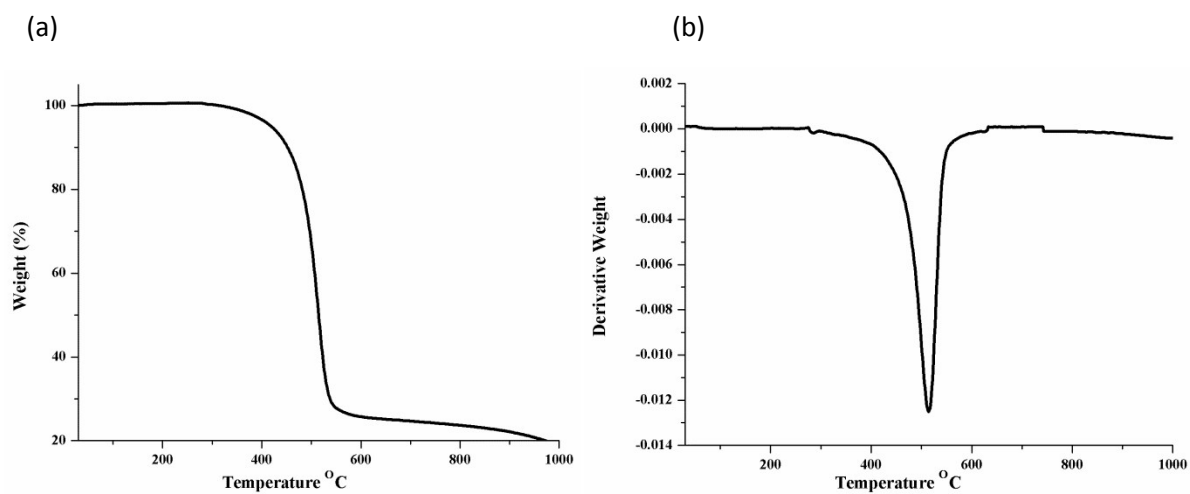

Figure S33: TG (a) and Derivative weight loss (b) plots of 2.

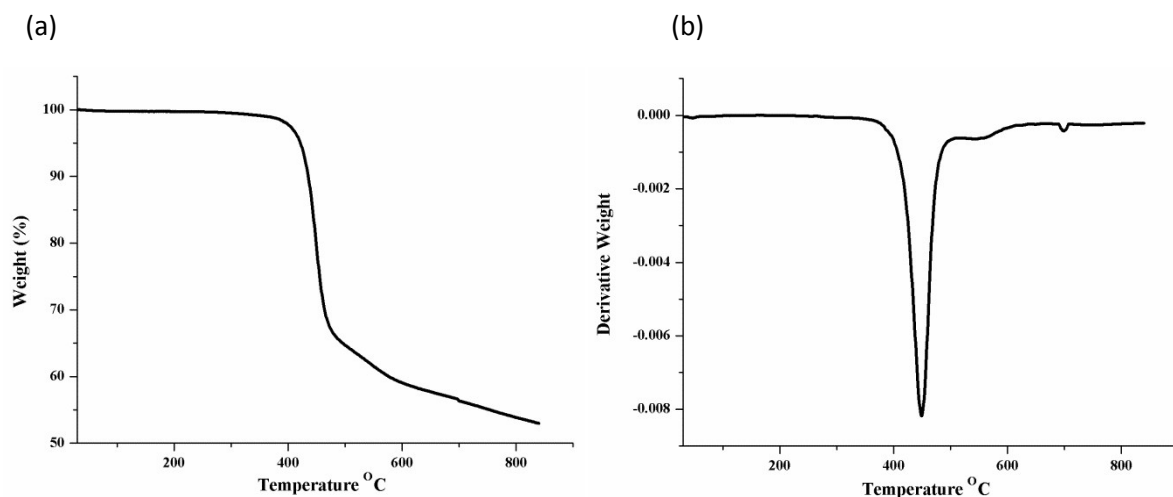

**Figure S34:** TG (a) and Derivative weight loss (b) plots of 3.

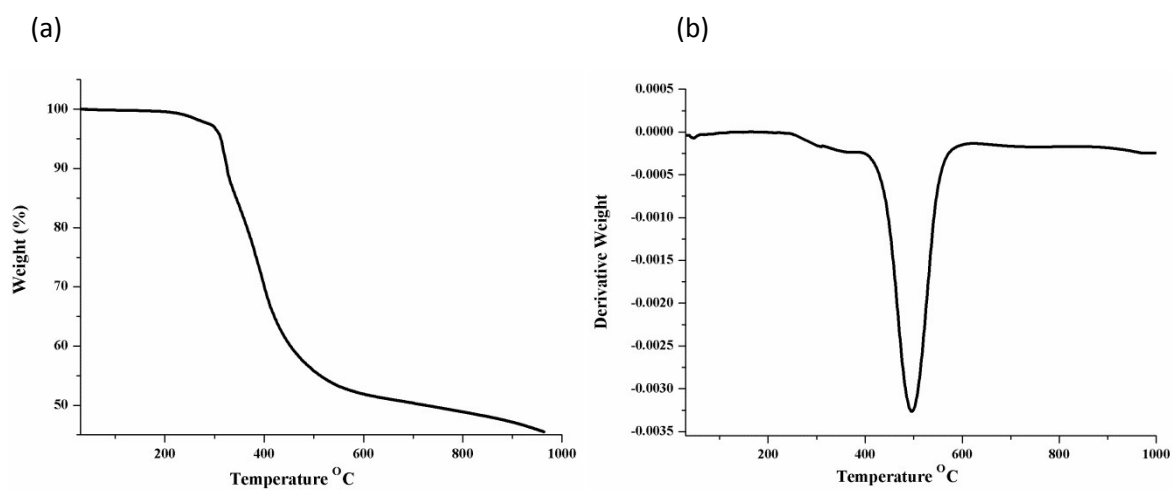

**Figure S35:** TG (a) and Derivative weight loss (b) plots of 4.

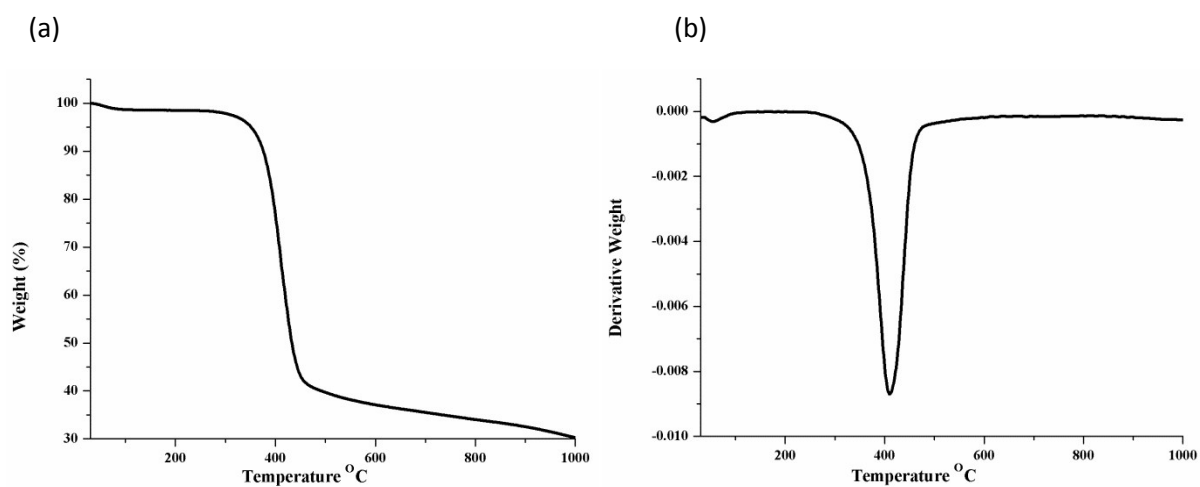

**Figure S36:** TG (a) and Derivative weight loss (b) plots of 5.
